# Supplementary material
Source: publisher figshare collection journal article supplement (https://gsajournals.figshare.com/articles/dataset/_/8986559)
Supplement: Supplementary file 1 [file 1]

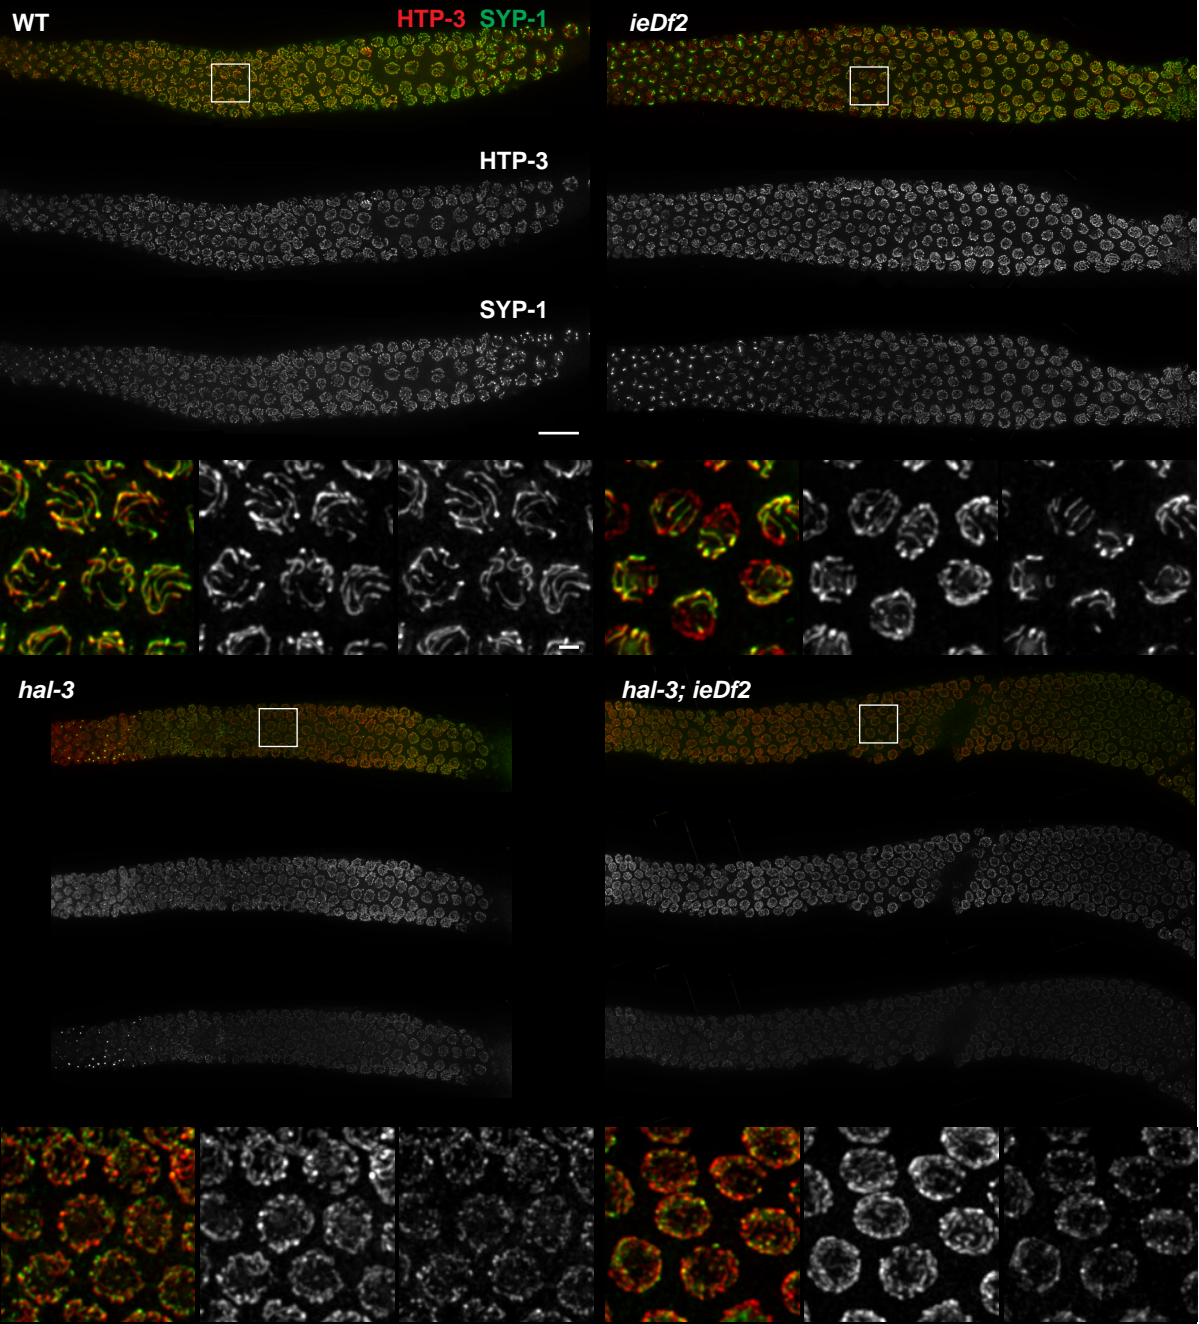

**Figure S5: Lack of PC-binding proteins or *hal-3* lead to different defects in synapsis.**

Images of zoomed-out gonads and nuclei from the mid-pachytene region immunostained for HTP-3 (red) and SYP-1 (green), illustrating the differences in appearance of nuclei with normal full synapsis (WT), delayed foldback synapsis on a subset of chromosomes (*ieDf2*), or loading of SYP-1 along the lengths of individual unpaired axes (*hal-3* and *hal-3; ieDf2*). In each set of panels showing zoomed-in fields of nuclei, HTP-3 is depicted in the center (grayscale) panel and SYP-1 is depicted in the right (grayscale) panel. Scale bar represents 2µm.
