# Supplementary material
Source: publisher figshare collection journal article supplement (https://gsajournals.figshare.com/articles/dataset/_/8986559)
Supplement: Supplementary file 2 [file 1]

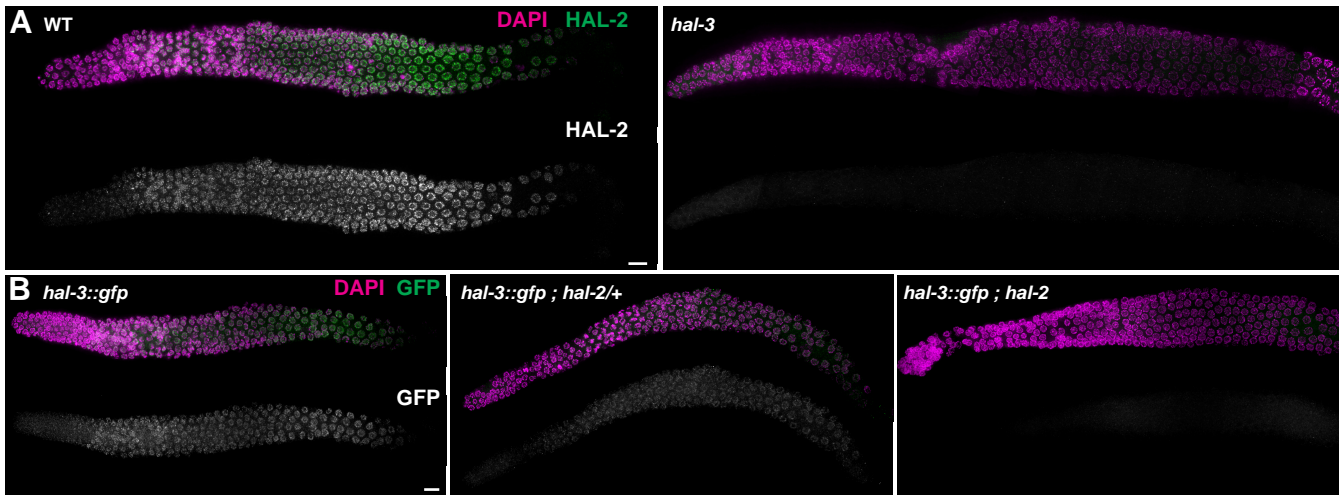

**Figure S2: Whole gonad images of samples presented in Figure 1.**

**A)** Immunodetection of HAL-2 in whole mount gonads of worms of the indicated genotypes. Samples are the same as in Figure 1D. **B)** Immunodetection of HAL-3::GFP fusion protein in whole mount gonads of worms of the indicated genotypes. Samples are the same as in Figure 1E. Importantly, the fusion protein could be detected in *hal-2/+* heterozygous worms (middle panel) but not in their *hal-2/hal-2* homozygous mutant siblings (right panel), indicating that transgene silencing is unlikely to account for the lack of signal observed in the *hal-2/hal-2* homozygote. In both panels, images are maximum intensity projections of the top layer of nuclei in the imaged gonads; scale bars represent 20µm.
