# Supplementary material
Source: publisher figshare collection journal article supplement (https://gsajournals.figshare.com/articles/dataset/_/8986559)
Supplement: Supplementary file 4 [file 1]

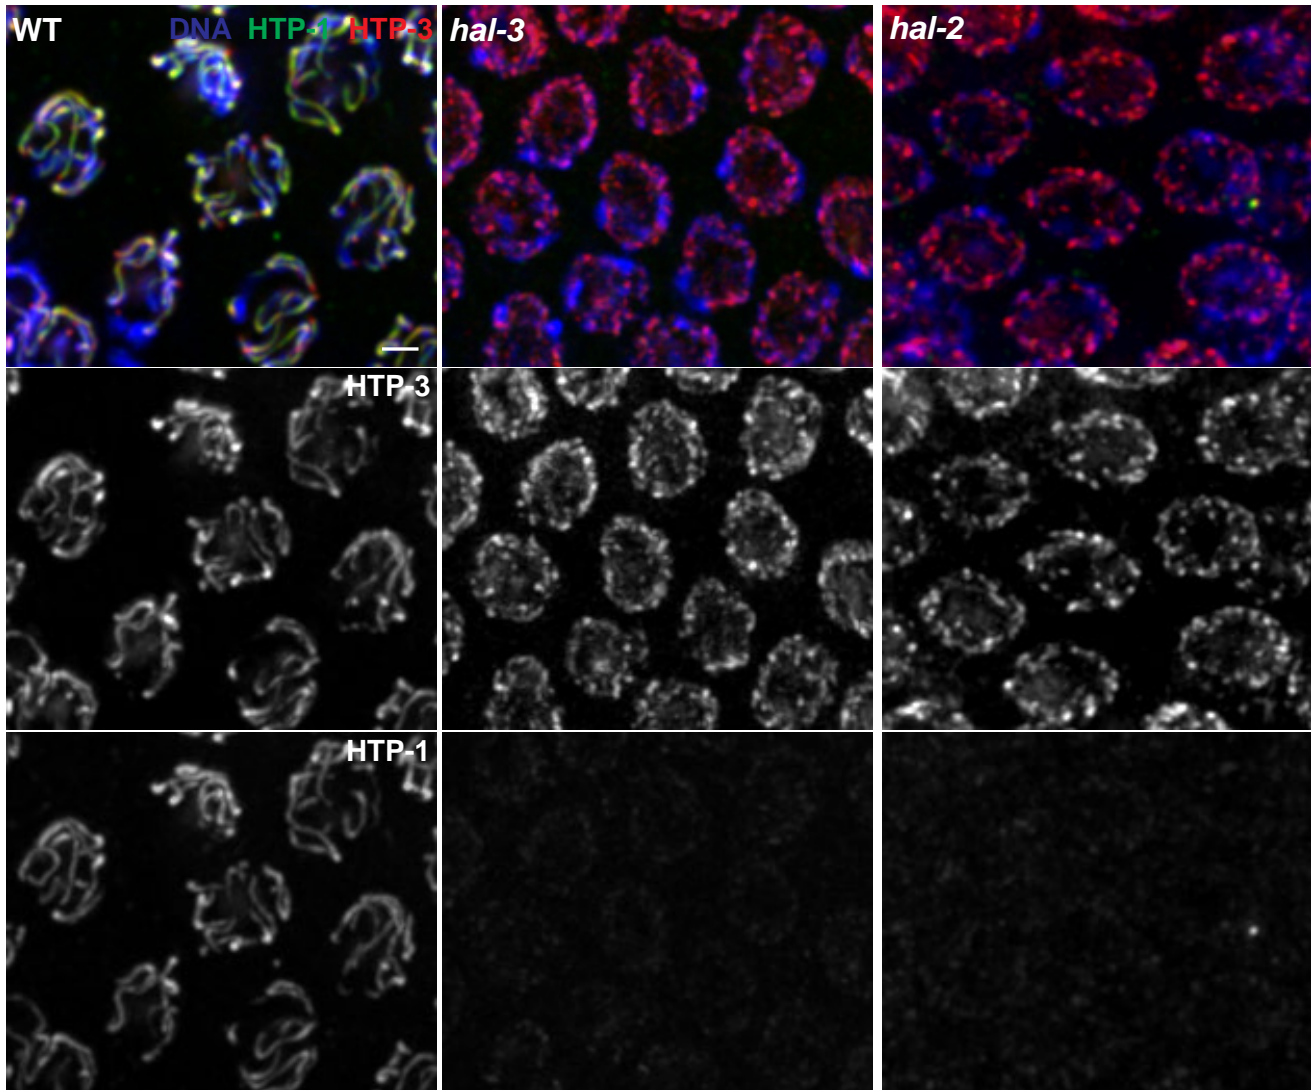

**Figure S7: Defective chromosomal association of axis protein HTP-1 in *hal* mutants**

Immunodetection of meiotic chromosome axis proteins HTP-3 and HTP-1, and DNA counterstained with DAPI (blue) in early pachytene nuclei of the indicated genotype indicates that, as previously described for *hal-2* (ZHANG *et al.* 2012), levels of axis-associated HTP-1 are strongly reduced in *hal-3* mutant meiocytes. Identical imaging conditions were used for the genotypes being compared.
