# Supplementary material
Source: publisher figshare collection journal article supplement (https://gsajournals.figshare.com/articles/dataset/_/8986559)
Supplement: Supplementary file 6 [file 1]

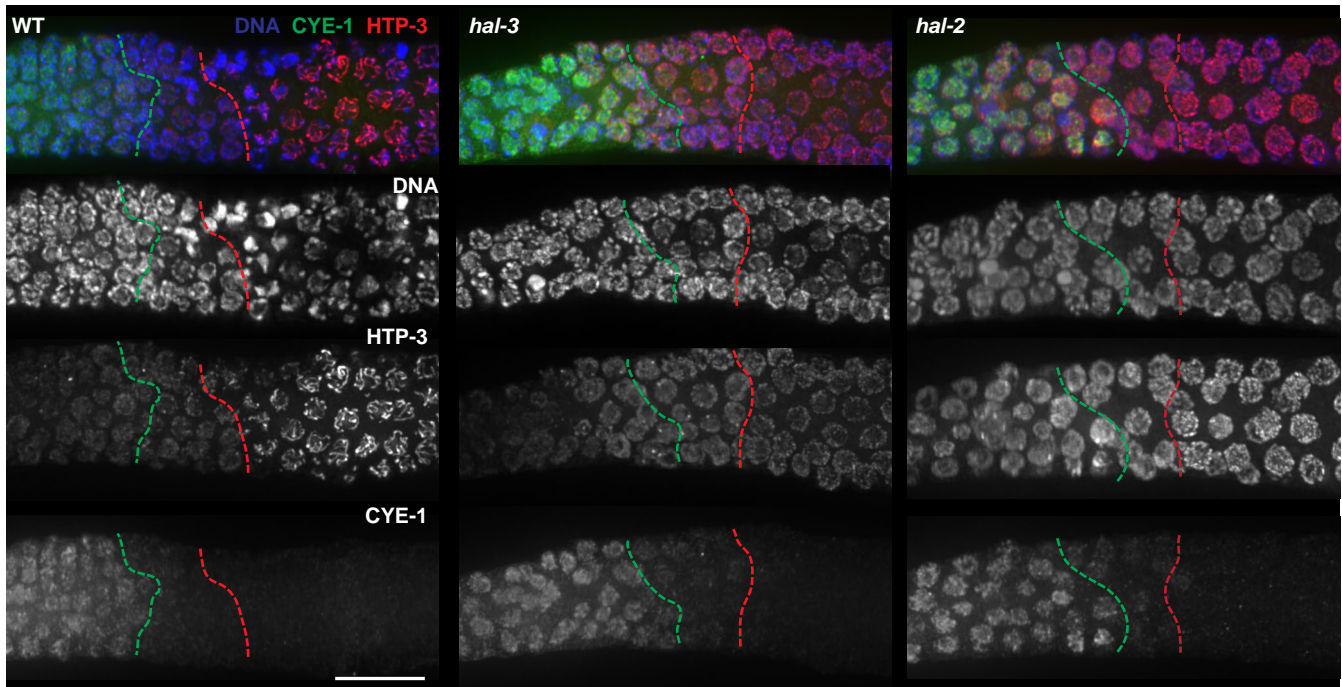

**Figure S4: Mitosis to meiosis transition is normal in *hal-2* and *hal-3* mutants**

Zoomed-in images of the meiotic entry region of the germ lines depicted in Figure 2A, providing merged images of mitotic cell cycle marker Cyclin E1 (CYE-1), chromosome axis marker HTP-3, and DAPI-stained DNA, together with single channel images. The green dashed lines represent the last row of nuclei with high CYE-1 signal; the red dashed lines represent the first row of nuclei with fully assembled chromosome axes. Scale bar represents 20 $\mu$ m.
